# Supplementary material for: Experimental evidence of the Sx state and fluorescence emission from the intramolecular charge transfer states in fucoxanthin
Source: Royal Society of Chemistry journal article supplement (doi:10.1039/d4cp03749a), 2024-01-01
Supplement: d4cp03749a1.pdf [file d4cp03749a1.pdf]

# Electronic Supplementary Information

## Experimental Evidence of the $S_x$ State and Fluorescence Emission from the Intramolecular Charge Transfer States in Fucoxanthin

Zhengtang Liu,<sup>\*†a</sup> Wenjun Ni,<sup>†b,c</sup> Yin Huang,<sup>†b</sup> Gagik Gurzadyan<sup>c</sup> and Xin Chen<sup>\*d</sup>

- School of Physical Science and Information Technology, Liaocheng University, Liaocheng, Shandong, China.
- Dalian Institute of Chemical Physics, Chinese Academy of Sciences, Dalian, Liaoning, China.
- School of Chemical Engineering, Dalian University of Technology, Dalian, Liaoning, China.
- Suzhou Laboratory, Suzhou, Jiangsu, China

\* Corresponding author: Z.L. [zhengtangliu@outlook.com](mailto:zhengtangliu@outlook.com), X. C. [mail.xinchen@gmail.com](mailto:mail.xinchen@gmail.com).

† These authors contributed equally to this work.

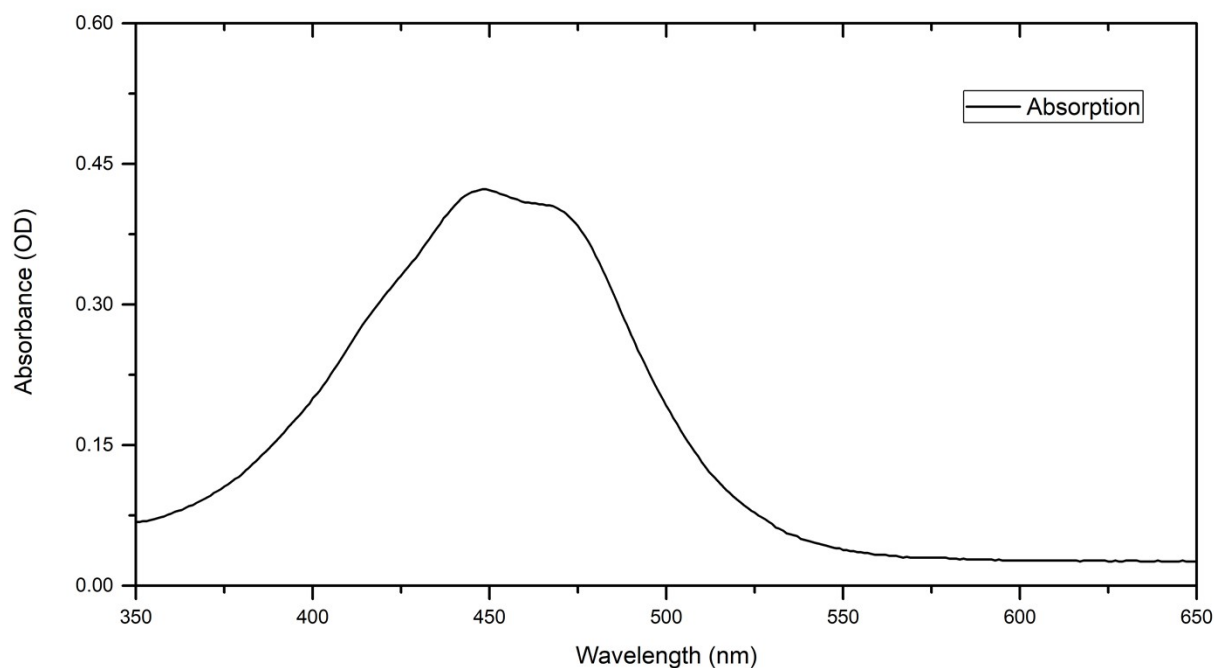

**Figure S1.** UV-Visible Spectrum of Fucoxanthin in Methanol.

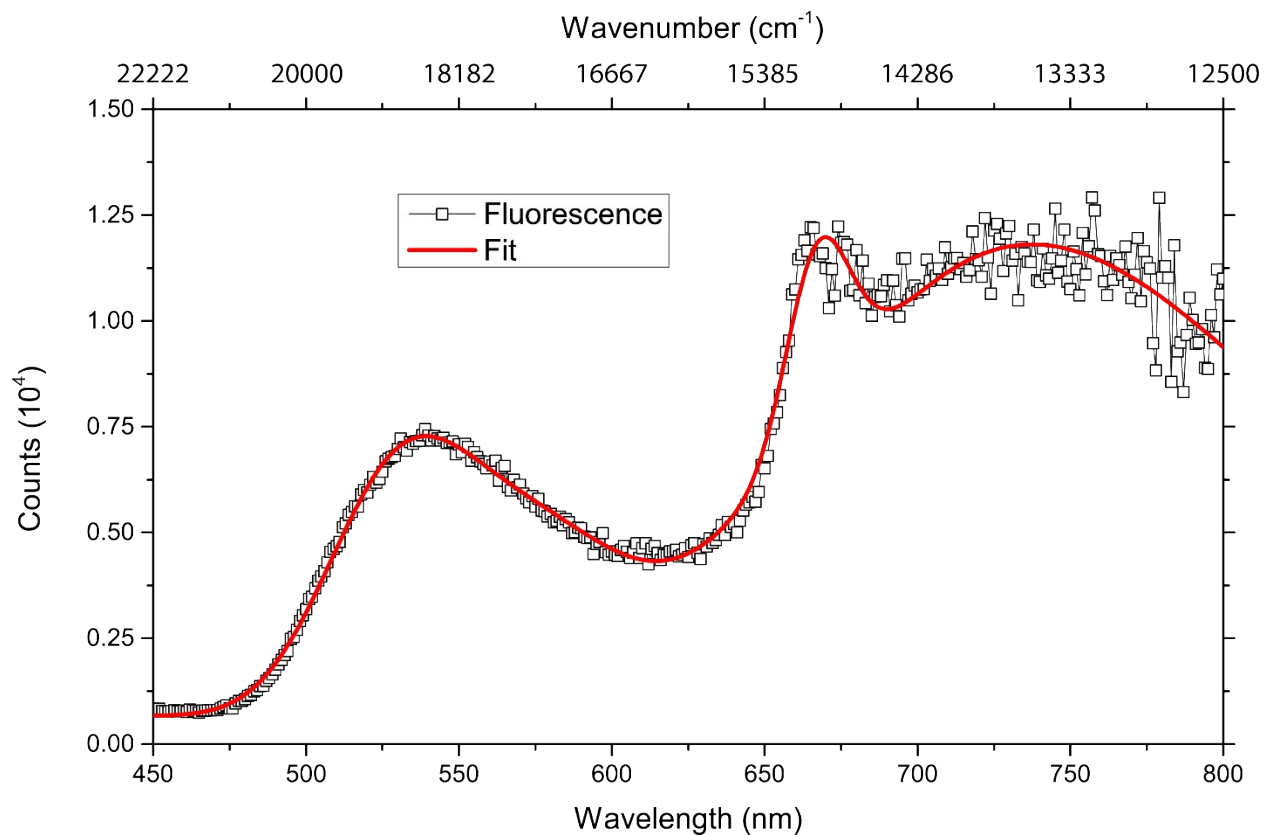

**Figure S2.** Fluorescence Emission Spectrum of Fucoxanthin in Methanol and The Fit Curve.

| Component                  | 1             | 2             | 3            | 4             |
|----------------------------|---------------|---------------|--------------|---------------|
| Amplitude                  | 6363.2±449.7  | 2309.8±961.9  | 4159.8±210.2 | 11098.3±144.5 |
| Center (cm <sup>-1</sup> ) | 18761.0±149.5 | 17146.9±216.9 | 14985.3±9.8  | 13558.6±19.6  |
| FWHM (cm <sup>-1</sup> )   | 1497.9±155.7  | 1125.5±214.6  | 357.9±20.9   | 2289.5±71.8   |

**Table S1.** The Parameters of Fit Curve Consisting of Four Gaussian Functions and R<sup>2</sup>=0.98.

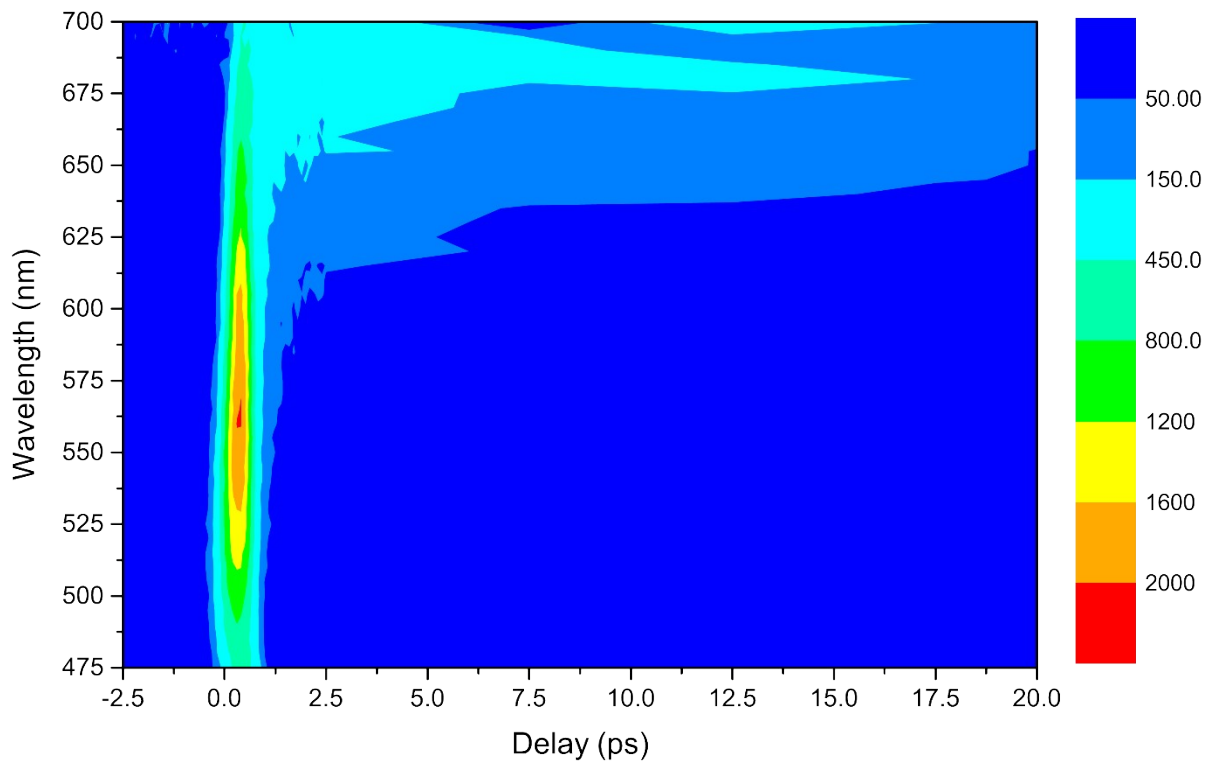

**Figure S3.** Femtosecond Fluorescence Up-Conversion Map of Fucoxanthin in Methanol.

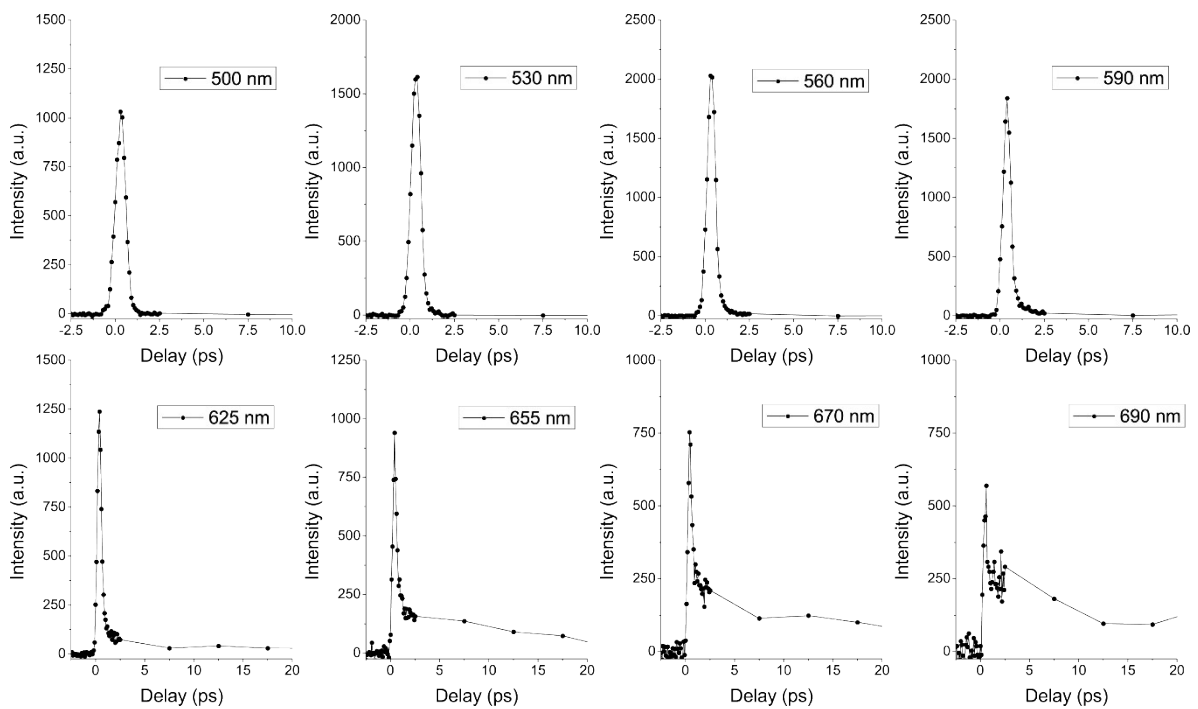

**Figure S4.** Fluorescence Dynamics of Fucoxanthin in Methanol at eight representative wavelengths.
